# Supplementary material for: Vitamin D Intake and the Risk of Colorectal Cancer: An Updated Meta-Analysis and Systematic Review of Case-Control and Prospective Cohort Studies
Source: MDPI journal article supplement (doi:10.3390/cancers13112814), 2021-06-04
Supplement: s1 [file s1]

## **Supplementary Materials**

**Table S1:** Search strategy

**Table S2.** Influence analysis using the leave-one out approach for the meta-analyses assessing the association between vitamin D intake (highest versus lowest categories) and the risk of colon, rectal and colorectal cancer.

**Figure S1.** Forest plot for the association between vitamin D intake (highest versus lowest categories) and risk of colorectal cancer (case-control and prospective studies).

**Figure S2.** Forest plot for the association between vitamin D intake (highest versus lowest categories) and risk of colon cancer (case-control and prospective studies).

**Figure S3.** Forest plot for the association between vitamin D intake (highest versus lowest categories) and risk of rectal cancer (case-control studies).

**Figure S4.** Graphic display of heterogeneity (GOSH) plot analyses for the different meta-analyses.

**Figure S5.** Funnel plot for detecting publication bias in the meta- analysis of case-control studies assessing the association between dietary vitamin D and colorectal cancer in all the subjects.

**Table S1.** Search strategy

| <b>PUBMED SEARCH</b><br>(using R packages “pubmed.mineR” and “RISmed”)                                                                                                                                                                                                                                                                                                                                                                                                                                                                                                                                                                                        |                                                           |
|---------------------------------------------------------------------------------------------------------------------------------------------------------------------------------------------------------------------------------------------------------------------------------------------------------------------------------------------------------------------------------------------------------------------------------------------------------------------------------------------------------------------------------------------------------------------------------------------------------------------------------------------------------------|-----------------------------------------------------------|
| '("colorectal neoplasms"[MeSh] OR<br>("colorectal"[ALL] AND "neoplasms"[ALL]) OR<br>"colorectal neoplasms"[ALL] OR<br>("colorectal"[ALL] AND "cancer"[ALL]) OR<br>"colorectal cancer"[ALL] OR<br>"colon cancer"[ALL] OR<br>"rectal cancer"[ALL] OR<br>"colon neoplasm"[ALL] OR<br>"rectal neoplasm"[ALL] OR<br>"colon polyp"[ALL] OR<br>"rectum polyp"[ALL] OR<br>"rectum adenocarcinoma"[ALL] OR<br>"colon adenocarcinoma"[ALL]) AND<br>("vitamin d"[MeSh] OR<br>"vitamin d"[ALL] OR<br>"ergocalciferols"[MeSh] OR<br>"ergocalciferols"[ALL] OR<br>"25-hydroxyvitamin D"[ALL] OR<br>"vitamin D2"[ALL] OR<br>"vitamin D3"[ALL] OR<br>"cholecalciferol"[ALL])' |                                                           |
| <b>COCHRANE SEARCH</b>                                                                                                                                                                                                                                                                                                                                                                                                                                                                                                                                                                                                                                        |                                                           |
| #1                                                                                                                                                                                                                                                                                                                                                                                                                                                                                                                                                                                                                                                            | MeSH descriptor: [Colorectal Neoplasms] explode all trees |
| #2                                                                                                                                                                                                                                                                                                                                                                                                                                                                                                                                                                                                                                                            | (colorectal neoplasms):ti,ab,kw                           |
| #3                                                                                                                                                                                                                                                                                                                                                                                                                                                                                                                                                                                                                                                            | (colorectal cancer):ti,ab,kw                              |
| #4                                                                                                                                                                                                                                                                                                                                                                                                                                                                                                                                                                                                                                                            | (colon cancer):ti,ab,kw                                   |
| #5                                                                                                                                                                                                                                                                                                                                                                                                                                                                                                                                                                                                                                                            | (rectal cancer):ti,ab,kw                                  |
| #6                                                                                                                                                                                                                                                                                                                                                                                                                                                                                                                                                                                                                                                            | (colon neoplasm):ti,ab,kw                                 |
| #7                                                                                                                                                                                                                                                                                                                                                                                                                                                                                                                                                                                                                                                            | (rectal neoplasm):ti,ab,kw                                |
| #8                                                                                                                                                                                                                                                                                                                                                                                                                                                                                                                                                                                                                                                            | (colon polyp):ti,ab,kw                                    |
| #9                                                                                                                                                                                                                                                                                                                                                                                                                                                                                                                                                                                                                                                            | (rectum polyp):ti,ab,kw                                   |

|     |                                                                  |
|-----|------------------------------------------------------------------|
| #10 | (rectum adenocarcinoma):ti,ab,kw                                 |
| #11 | (colon adenocarcinoma):ti,ab,kw                                  |
| #12 | #1 OR #2 OR #3 OR #4 OR #5 OR #6 OR #7 OR #8 OR #9 OR #10 OR #11 |
| #13 | MeSH descriptor: [Hydroxycholecalciferols] explode all trees     |
| #14 | (vitamin d):ti,ab,kw                                             |
| #15 | (ergocalciferols):ti,ab,kw                                       |
| #16 | (25(OH)D):ti,ab,kw                                               |
| #17 | ("25-hydroxyvitamin-D"):ti,ab,kw                                 |
| #18 | (vitamin D2):ti,ab,kw                                            |
| #19 | (vitamin D3):ti,ab,kw                                            |
| #20 | (cholecalciferol):ti,ab,kw                                       |
| #21 | #13 OR #14 OR #15 OR #17 OR #18 OR #19 OR #20                    |
| #22 | #12 AND #21                                                      |

**Table S2.** Influence analysis using the leave-one out approach for the meta-analyses assessing the association between vitamin D intake (highest versus lowest categories) and the risk of colon, rectal and colorectal cancer.

| Author                                          | OR/HR (95% CI)           | % change OR/HR | I <sup>2</sup> | Tau <sup>2</sup> |
|-------------------------------------------------|--------------------------|----------------|----------------|------------------|
| <b>CCS – CRC – Dietary Vit D – All subjects</b> | <b>0.75 (0.67; 0.85)</b> | <b>NA</b>      | <b>46*</b>     | <b>0.0184</b>    |
| Omitting Levi et al. 2000 <sup>¥</sup>          | 0.73 (0.66; 0.80)        | -3.35          | 17             | 0.0042           |
| Omitting Jenab et al. 2010                      | 0.75 (0.66; 0.85)        | -0.84          | 49*            | 0.0209           |
| Omitting Key et al. 2011                        | 0.75 (0.66; 0.86)        | -0.47          | 50*            | 0.0221           |
| Omitting Sun et al. 2012                        | 0.75 (0.66; 0.86)        | -0.39          | 50*            | 0.023            |
| Omitting Mizoue et al. 2008                     | 0.75 (0.66; 0.86)        | -0.26          | 50*            | 0.0217           |
| Omitting Boutron et al. 1996                    | 0.75 (0.66; 0.85)        | -0.07          | 50*            | 0.0207           |
| Omitting La Vecchia et al. 1997                 | 0.75 (0.66; 0.87)        | -0.05          | 50*            | 0.0245           |
| Omitting Theodoratou et al. 2008                | 0.75 (0.66; 0.87)        | -0.05          | 50*            | 0.0246           |
| Omitting Olsen et al. 1994                      | 0.75 (0.67; 0.85)        | -0.03          | 50*            | 0.0206           |
| Omitting Ferraroni et al. 1994                  | 0.76 (0.66; 0.87)        | 0.43           | 51*            | 0.0234           |
| Omitting Banqu  t et al. 2012                   | 0.77 (0.69; 0.86)        | 2.15           | 35             | 0.0112           |
| Omitting Zhang et al. 2020                      | 0.78 (0.70; 0.87)        | 3.82           | 23             | 0.007            |
| <b>CCS – CC – Dietary Vit D – All subjects</b>  | <b>0.82 (0.67; 0.98)</b> | <b>NA</b>      | <b>55</b>      | <b>0.0396</b>    |
| Omitting Kampman et al. 2000 [Men] <sup>¥</sup> | 0.75 (0.65; 0.86)        | -8.47          | 10*            | 0.0034           |
| Omitting Kampman et al. 2000 [Women]            | 0.79 (0.65; 0.96)        | -3.42          | 55*            | 0.0372           |
| Omitting Jenab et al. 2010                      | 0.8 (0.65; 0.98)         | -2.39          | 58*            | 0.0427           |
| Omitting Ferraroni et al. 1994                  | 0.83 (0.66; 1.04)        | 1.84           | 61*            | 0.0545           |
| Omitting Mizoue et al. 2008                     | 0.83 (0.68; 1.03)        | 2.40           | 60*            | 0.0476           |
| Omitting Lipworth et al. 2009                   | 0.84 (0.68; 1.04)        | 2.97           | 60*            | 0.0491           |
| Omitting Pritchard et al. 1996                  | 0.84 (0.69; 1.03)        | 3.49           | 58*            | 0.0412           |
| Omitting Zhang et al. 2020                      | 0.85 (0.68; 1.05)        | 3.97           | 55*            | 0.0472           |
| <b>CCS – RC – Dietary Vit D – All subjects</b>  | <b>0.67 (0.51; 0.87)</b> | <b>NA</b>      | <b>70*</b>     | <b>0.1127</b>    |
| Omitting Lipworth et al. 2009 <sup>¥</sup>      | 0.62 (0.48; 0.79)        | -7.57          | 59*            | 0.0699           |
| Omitting Slattery et al. 2004 [Men]             | 0.63 (0.48; 0.82)        | -6.23          | 66*            | 0.0953           |
| Omitting Mizoue et al. 2008                     | 0.65 (0.48; 0.88)        | -2.39          | 74*            | 0.1301           |
| Omitting Ferraroni et al. 1994                  | 0.66 (0.48; 0.90)        | -1.52          | 74*            | 0.1427           |
| Omitting Jenab et al. 2010                      | 0.67 (0.50; 0.90)        | 0.79           | 74*            | 0.1271           |
| Omitting Slattery et al. 2004 [Women]           | 0.69 (0.51; 0.92)        | 2.88           | 73*            | 0.1241           |
| Omitting Pritchard et al. 1996                  | 0.69 (0.52; 0.92)        | 3.06           | 73*            | 0.1212           |
| Omitting Hosseinzadeh et al. 2019               | 0.71 (0.54; 0.93)        | 5.62           | 70*            | 0.1051           |
| Omitting Zhang et al. 2020                      | 0.71 (0.54; 0.93)        | 6.42           | 63*            | 0.092            |
| <b>PCS – CRC – Dietary Vit D – All subjects</b> | <b>0.94 (0.79; 1.11)</b> | <b>NA</b>      | <b>7</b>       | <b>0.015</b>     |
| Omitting Ishihara et al. 2008 [Women]           | 0.89 (0.77; 1.02)        | -5.20          | 14             | 0.0037           |
| Omitting J  rvinen et al. 2001                  | 0.90 (0.78; 1.03)        | -4.17          | 19             | 0.0051           |
| Omitting Ishihara et al. 2008 [Men]             | 0.95 (0.78; 1.16)        | 1.67           | 50             | 0.0228           |
| Omitting McCullough et al. 2003                 | 0.97 (0.77; 1.21)        | 3.15           | 50             | 0.0289           |
| Omitting Park et al. 2007 [Men]                 | 0.98 (0.77; 1.23)        | 4.17           | 50             | 0.0321           |
| Omitting Park et al. 2007 [Women]               | 0.99 (0.83; 1.19)        | 6.09           | 23             | 0.0099           |
| <b>PCS – CRC – Dietary Vit D – Women</b>        | <b>0.93 (0.81; 1.07)</b> | <b>NA</b>      | <b>20</b>      | <b>0.007</b>     |
| Omitting Terry et al. 2002                      | 0.90 (0.77; 1.05)        | -3.67          | 16             | 0.0062           |
| Omitting Ishihara et al. 2008                   | 0.90 (0.80; 1.02)        | -3.50          | 0              | 0                |
| Omitting McCullough et al. 2003                 | 0.92 (0.79; 1.07)        | -1.28          | 27             | 0.0098           |
| Omitting Lin et al. 2005                        | 0.94 (0.80; 1.1)         | 0.49           | 33             | 0.0125           |
| Omitting Keese et al. 2005                      | 0.95 (0.81; 1.11)        | 1.33           | 33             | 0.0128           |
| Omitting Mart  nez et al. 1996                  | 0.96 (0.82; 1.13)        | 3.00           | 29             | 0.012            |
| Omitting Park et al. 2007                       | 1.00 (0.86; 1.15)        | 6.63           | 0              | 0                |

Data show the leave-one out approach for the different meta-analyses with more than 4 study comparisons. Meta-analyses were performed using generic inverse-variance random effects models. Legend for studies:

¥, reported as an outlier. **Legend for I<sup>2</sup> column:** \*, P-value ≤0.05; ‡, P-value >0.05 and <0.10. **Abbreviations:** CC, colon cancer; CCS, case-control studies; CI, confidence interval; CRC, colorectal cancer; NA, not applicable; PCS, prospective cohort studies; RC, rectal cancer; Vit, vitamin.

**Figure S1.** Forest plot for the association between vitamin D intake (highest versus lowest categories) and risk of colorectal cancer (case-control and prospective studies).

**A) Case-control studies – Supplemental vitamin D - All subjects**

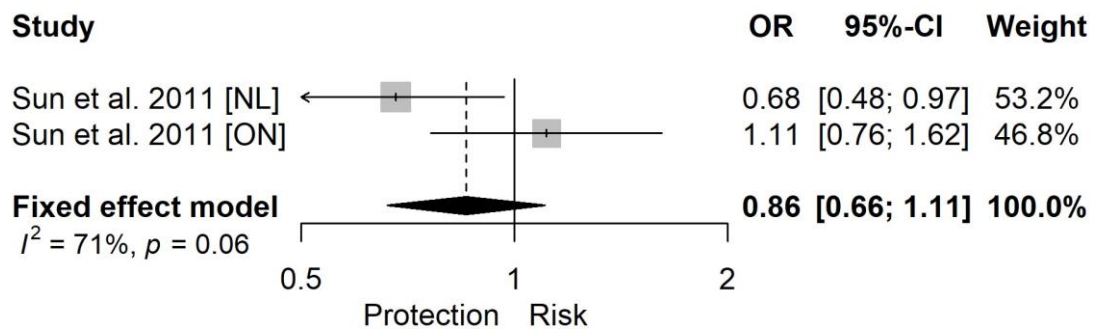

**B) Case-control studies - Total vitamin D - All subjects**

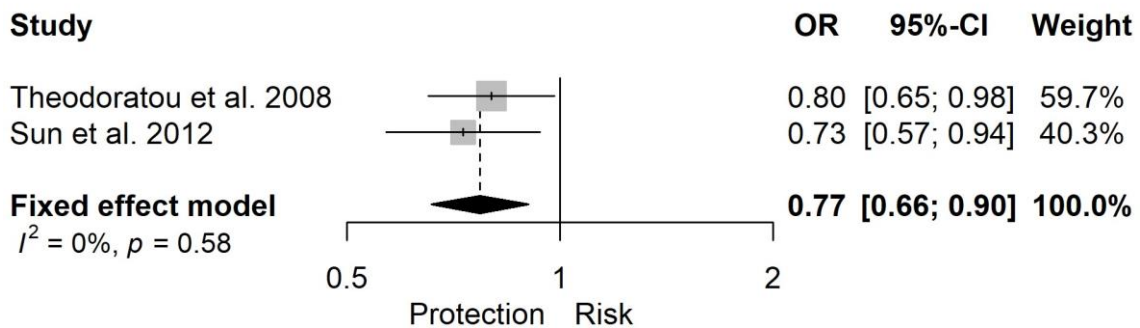

**C) Prospective cohort studies - Dietary vitamin D - Men**

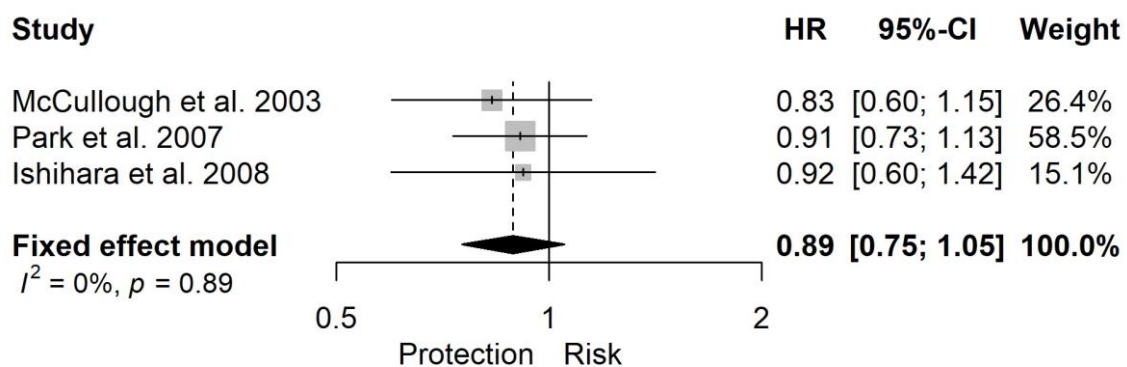

#### D) Prospective cohort studies - Dietary vitamin D - Women

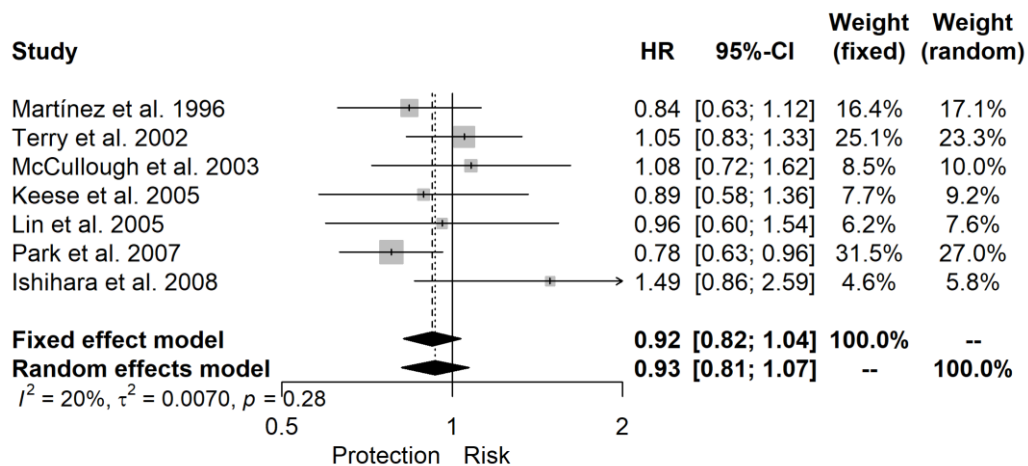

#### E) Prospective cohort studies - Supplemental vitamin D - All subjects

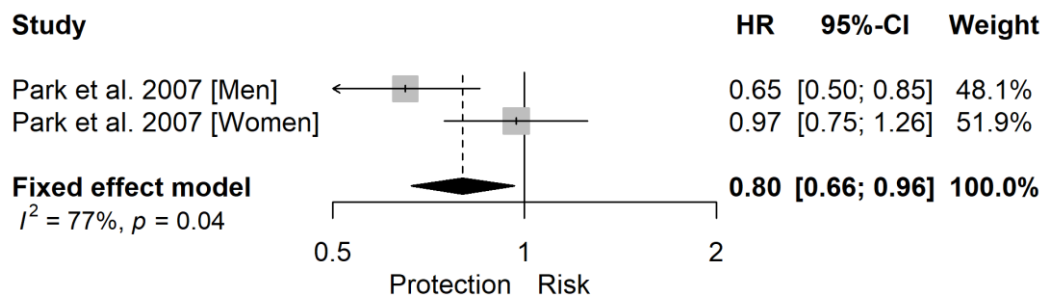

#### F) Prospective cohort studies - Supplemental vitamin D – Women

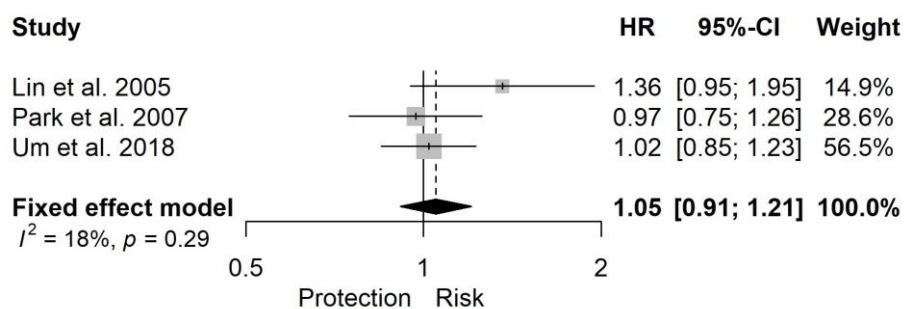

### G) Prospective cohort studies - Total vitamin D - All subjects

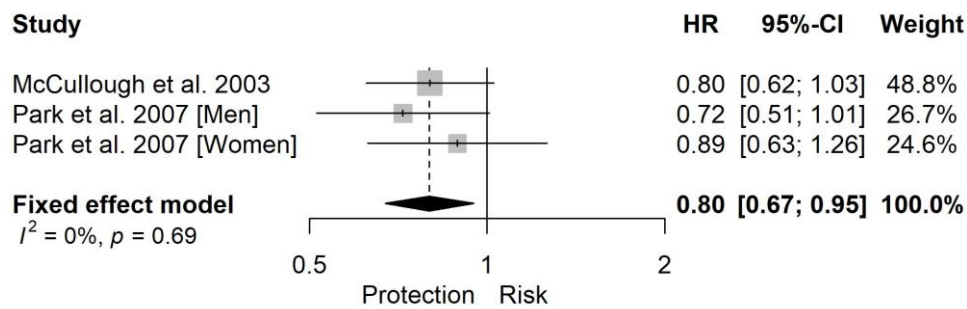

### H) Prospective cohort studies - Total vitamin D – Men

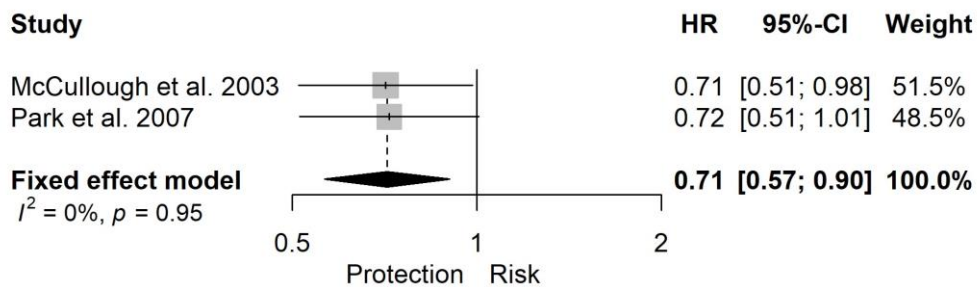

### I) Prospective cohort studies - Total vitamin D - Women

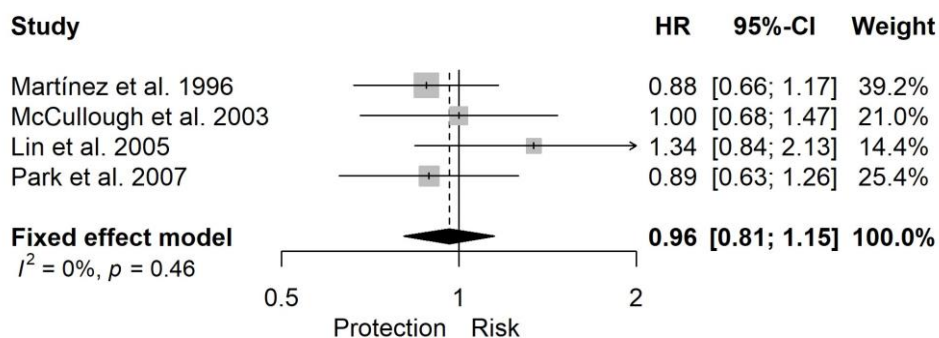

Meta-analyses were constructed using generic inverse-variance fixed-effects model (for meta-analysis with less than 5 studies) or both fixed and random-effects model (for meta-analysis with 5 or more studies). **Abbreviations:** CI, confidence interval; HR, hazard ratio; OR, odds ratio.



**Figure S2.** Forest plot for the association between vitamin D intake (highest versus lowest categories) and risk of colon cancer (case-control and prospective studies).

**A) Case-control studies – Dietary Vit D - All subjects**

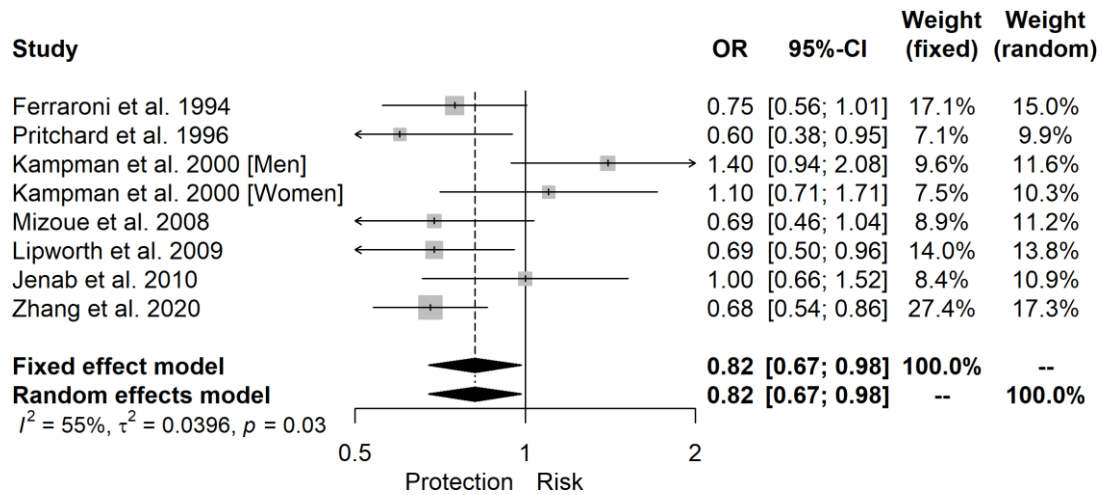

**B) Case-control studies - Dietary vitamin D – Men**

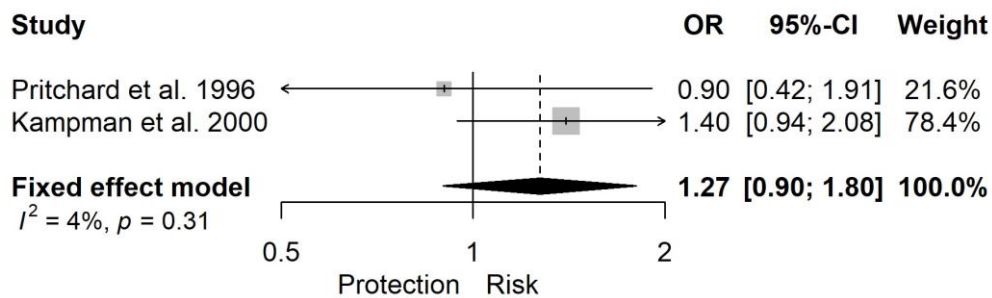

**C) Case-control studies - Dietary vitamin D – Women**

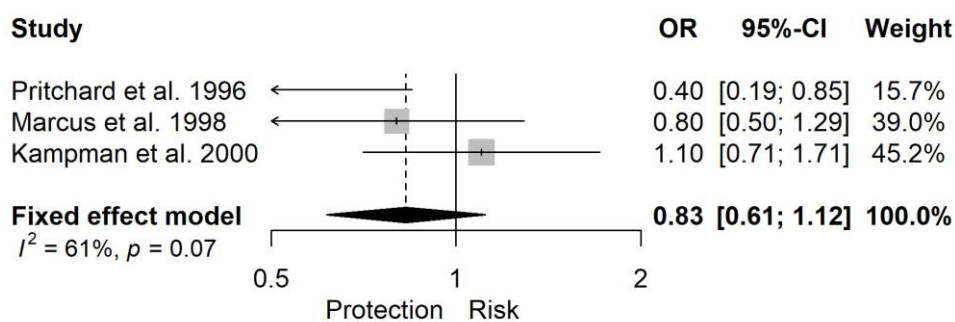

#### D) Case-control studies - Supplemental vitamin D - All subjects

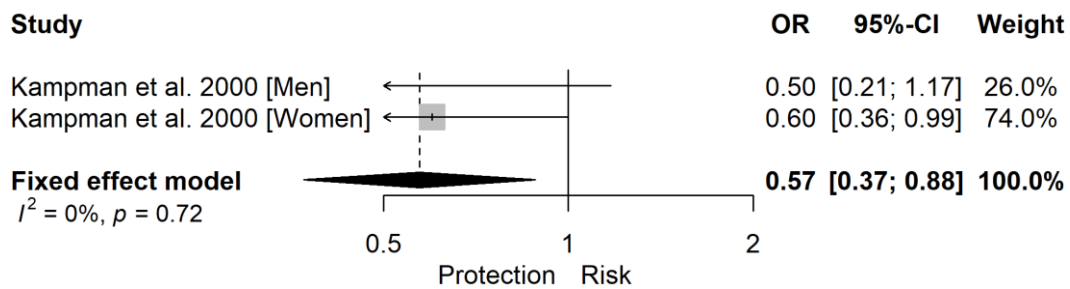

#### E) Case-control studies - Supplemental vitamin D - Women

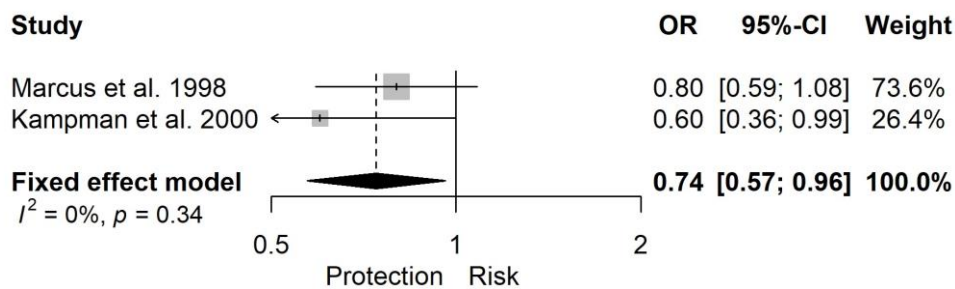

#### F) Prospective cohort studies - Dietary vitamin D – Women

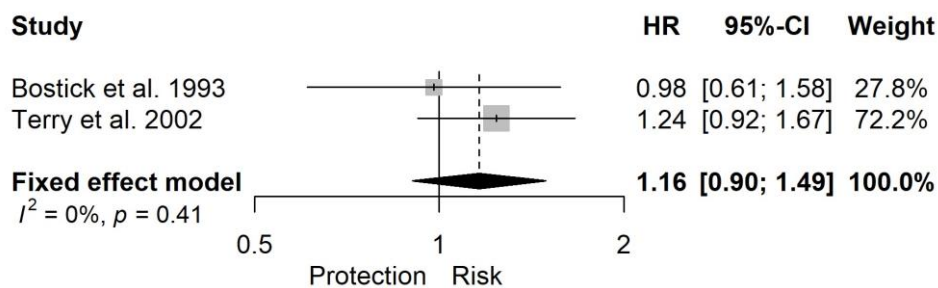

Meta-analyses were constructed using generic inverse-variance fixed-effects model (for meta-analysis with less than 5 studies) or both fixed and random-effects model (for meta-analysis with 5 or more studies). **Abbreviations:** CI, confidence interval; HR, hazard ratio; OR, odds ratio.

**Figure S3.** Forest plot for the association between vitamin D intake (highest versus lowest categories) and risk of rectal cancer (case-control studies).

**A) Case-control studies - Dietary vitamin D - All subjects**

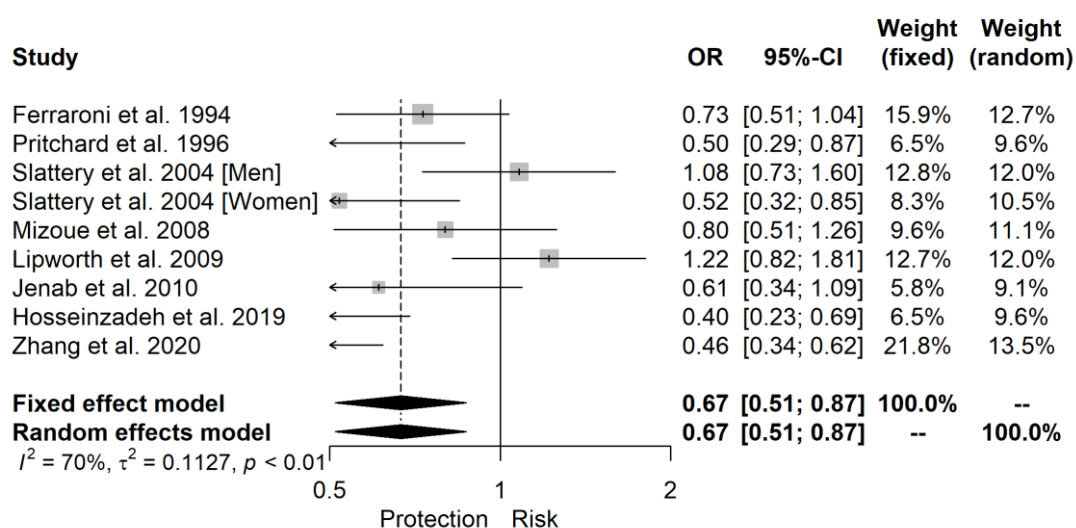

**B) Case-control studies - Dietary vitamin D - Men**

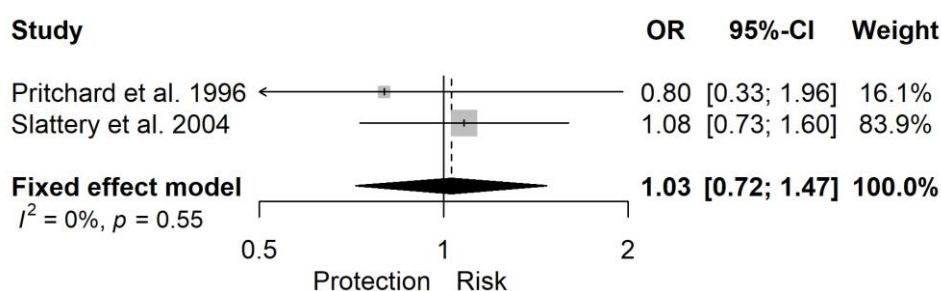

**C) Case-control studies - Dietary vitamin D - Women**

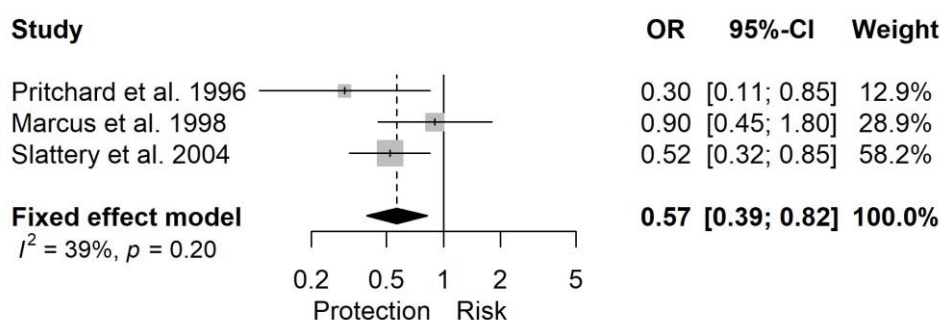

Meta-analyses were constructed using generic inverse-variance fixed-effects model (for meta-analysis with less than 5 studies) or both fixed and random-effects model (for meta-analysis with 5 or more studies). **Abbreviations:** CI, confidence interval; HR, hazard ratio; OR, odds ratio.

**Figure S4.** Graphic display of heterogeneity (GOSH) plot analyses for the different meta-analyses

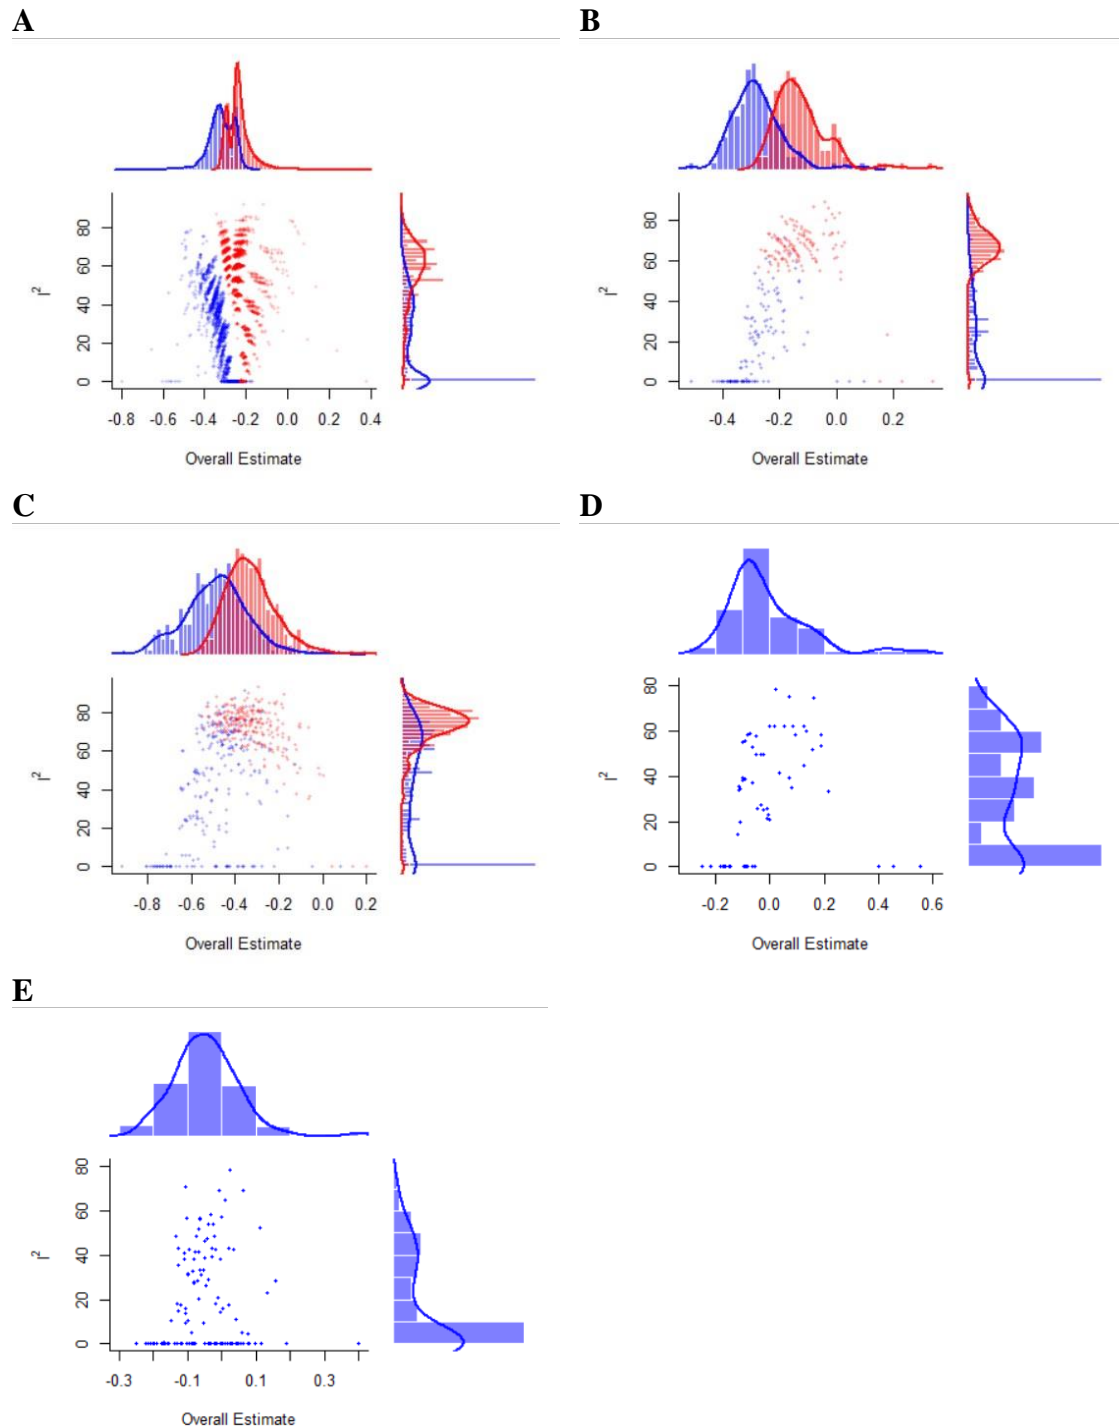

All the iterative meta-analyses ( $2^{\text{studies}} - 1$  individual analyses) were constructed using generic inverse-variance random-effects model. **Blue** was used for plotting results considering iterative combinations excluding the outliers (Levi et al. 2000 in **A**; Kampman et al. 2000 [Men] in **B**; and Lipworth et al. 2009 in **C**), whereas **red** color is used to plot results including each respective outlier. Plots are for: **A.** CCS – CRC – Dietary Vit D – All subjects (12 studies, thus including 4095 possible subsets); **B.** CCS – CC – Dietary Vit D – All subjects (8 studies, thus including 255 possible subsets); **C.** CCS – RC – Dietary Vit D – All subjects (9 studies, thus including 511 possible subsets); **D.** PCS – CRC – Dietary Vit D – All subjects (6 studies, thus including 63 possible subsets); **E.** PCS – CRC – Dietary Vit D – Women (7 studies, thus including 127 possible subsets). **Abbreviations:** CC, colon cancer; CCS, case-control studies; CRC,

colorectal cancer; **GOSH**, graphic display of heterogeneity. **NA**, not applicable; **PCS**, prospective cohort studies; **RC**, rectal cancer; **Vit**, vitamin.

**Figure S5.** Funnel plot for detecting publication bias in the meta-analysis of case-control studies assessing the association between dietary vitamin D and colorectal cancer in all the subjects

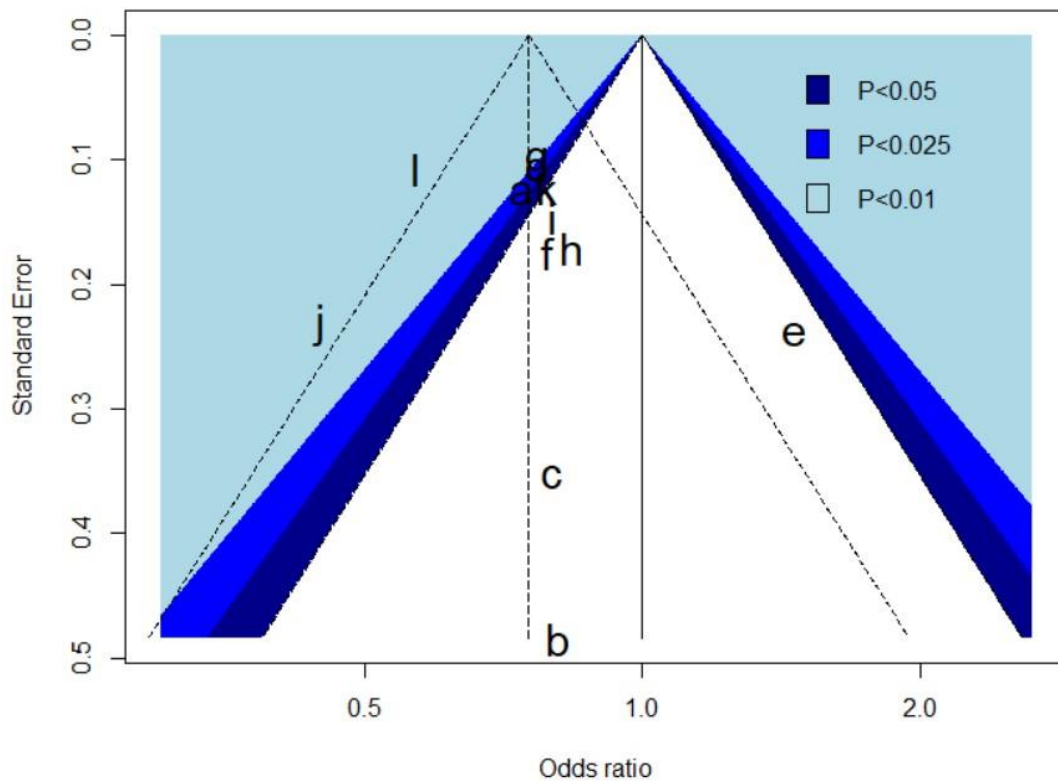

This contour-enhanced funnel plot shows the standard error and odds ratio for each of the studies of the meta-analysis. The different contour colors indicate the significance level (*see* legend in the plot) into which the effects size of each study falls. Egger's test for funnel plot asymmetry was not significant ( $P=0.508$ ). **Legend:** (a) Ferraroni et al. 1994; (b) Olsen et al. 1994; (c) Boutron et al. 1996; (d) La Vecchia et al. 1997; (e) Levi et al. 2000; (f) Mizoue et al. 2008; (g) Theodoratou et al. 2008; (h) Jenab et al. 2010; (i) Key et al. 2011; (j) Banqu   et al. 2012; (k) Sun et al. 2012; (l) Zhang et al. 2020. **Note that studies: a, d, g and k overlap in the plot.**
